# Supplementary material for: Clinical features and long‐term management of cats with primary hypoadrenocorticism using desoxycorticosterone pivalate and prednisolone
Source: PubMed Central journal article supplement — J Vet Intern Med. 2023 Feb 21;37(2):420–7. doi: 10.1111/jvim.16658 (PMC10061202; doi:10.1111/jvim.16658), 2023-02-21
Supplement: JVIM-37-420-s001.pdf [file JVIM-37-420-s001.pdf]

### Supplementary Table 1

#### Width of the left and right adrenal glands of the 11 cats with PH

| <b>Cat</b> | <b>Left adrenal gland (mm)</b> | <b>Right adrenal gland (mm)</b> | <b>General assessment by radiologist</b> |
|------------|--------------------------------|---------------------------------|------------------------------------------|
| <b>1</b>   | 3.9                            | 3.3                             | Normal in size                           |
| <b>2</b>   | 1.9                            | 1.2                             | Smaller than normal                      |
| <b>3</b>   | 1.8                            | 1.6                             | Smaller than normal,<br>normal shape     |
| <b>4</b>   | 1.8                            | 2.1                             | Smaller than normal,<br>normal shape     |
| <b>5</b>   | 1.2                            | 2.7                             | Smaller than normal                      |
| <b>6</b>   | 1.8                            | 1.6                             | Smaller than normal                      |
| <b>7</b>   | 3.5                            | 3.7                             | Normal in size                           |
| <b>8</b>   | 3.0                            | 4.3                             | Normal in size                           |
| <b>9</b>   | 2.0                            | 2.0                             | Smaller than normal                      |
| <b>10</b>  | 2.7                            | 2.7                             | Normal in size                           |
| <b>11</b>  | 3.1                            | 3.6                             | Normal in size                           |
